# Supplementary material for: Electrochromic properties of MnO2/WO3 bilayered electrodes for enhanced charge storage and superior stability
Source: Royal Society of Chemistry journal article supplement (doi:10.1039/d4lf00198b), 2024-01-01
Supplement: d4lf00198b1.pdf [file d4lf00198b1.pdf]

## Electrochromic Properties of MnO<sub>2</sub>/WO<sub>3</sub> Bilayered Electrodes for Enhanced Charge Storage and Superior Stability

Ranjana Venugopal,<sup>a,b</sup> Anjitha Dinakaran,<sup>a</sup> Meenu C. Nair,<sup>a</sup> Arathy C.B.,<sup>a,b</sup> Nayan Dev Madhavan,<sup>a,b</sup> and Biswapriya Deb\*<sup>a,b</sup>

<sup>a</sup> Centre for Sustainable Energy Technologies (C-SET), CSIR-National Institute for Interdisciplinary Science and Technology (CSIR-NIIST), Thiruvananthapuram-695019, India;

<sup>b</sup> Academy of Scientific and Innovative Research (AcSIR), Ghaziabad-201002, India;

Tel: 0091-471-2515478; E-mail: [biswapriya.deb@niist.res.in](mailto:biswapriya.deb@niist.res.in)

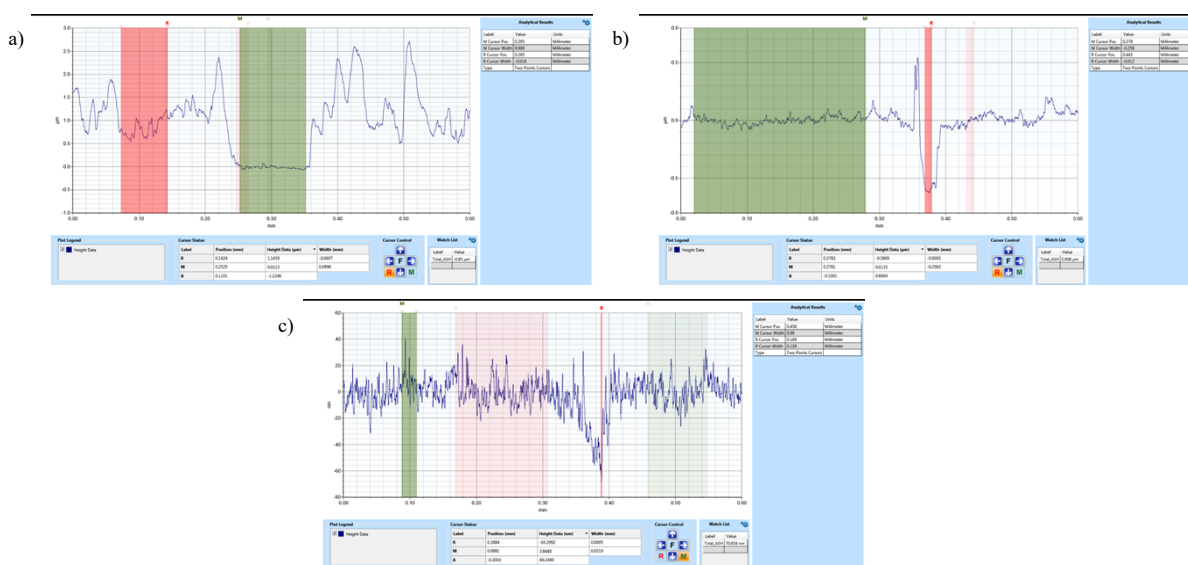

Fig. S1. Film thickness by stylus profilometry. The dip is originated from a scratched off portion. The red and green areas were used for the height averaging: a) AW, b) CW, and c) MnO<sub>2</sub>

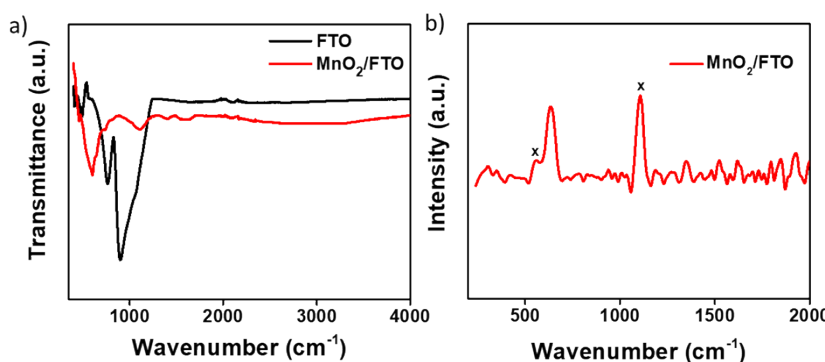

Fig S2. a) FTIR and b) Raman spectra of MnO<sub>2</sub> grown on FTO surface

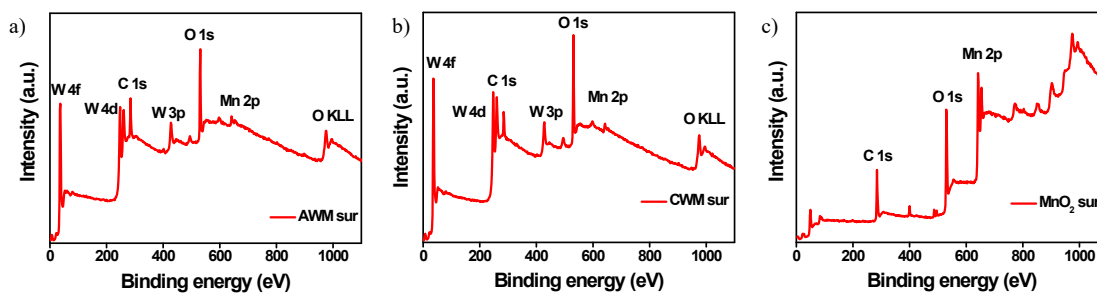

Fig. S3. Survey spectra of a) AWM, b) CWM, c) MnO<sub>2</sub>

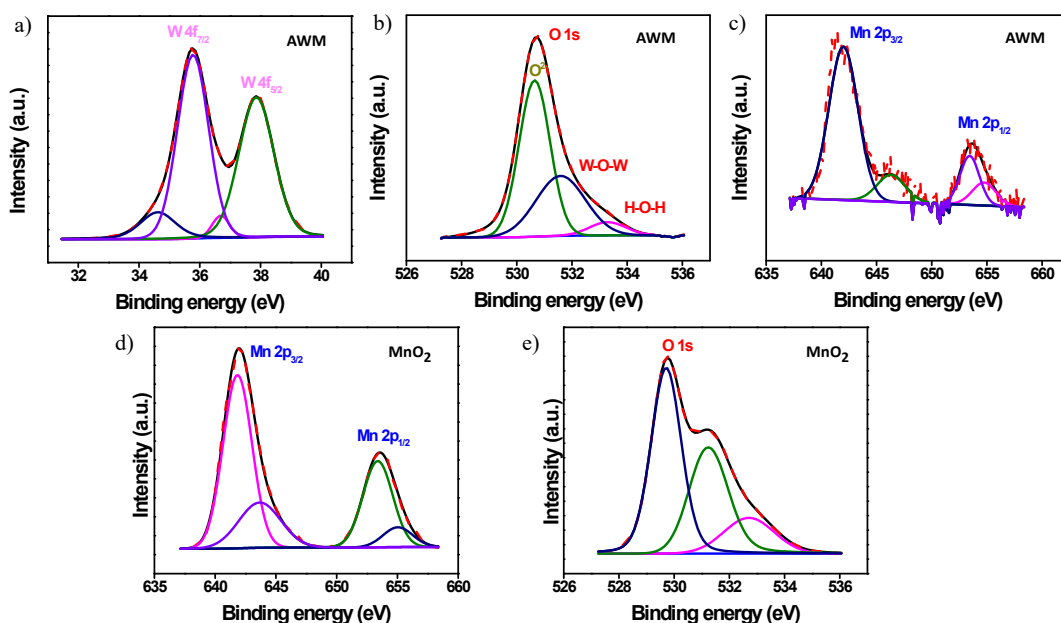

Fig. S4. High-resolution spectra of AWM: a) W 4f, b) O 1s, c) Mn 2p; High-resolution spectra of MnO<sub>2</sub>: d) Mn 2p, and e) O 1s

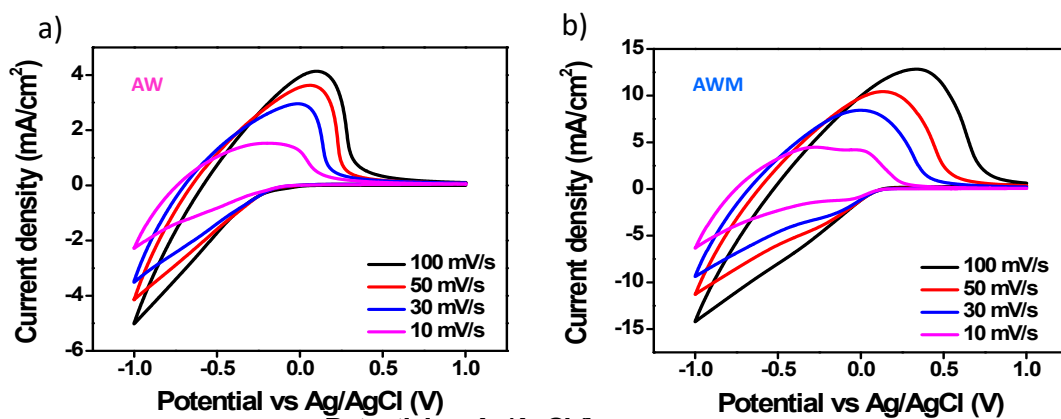

Fig. S5. Cyclic voltammetry plots at variable scan rates of a) AW film, b) AWM film

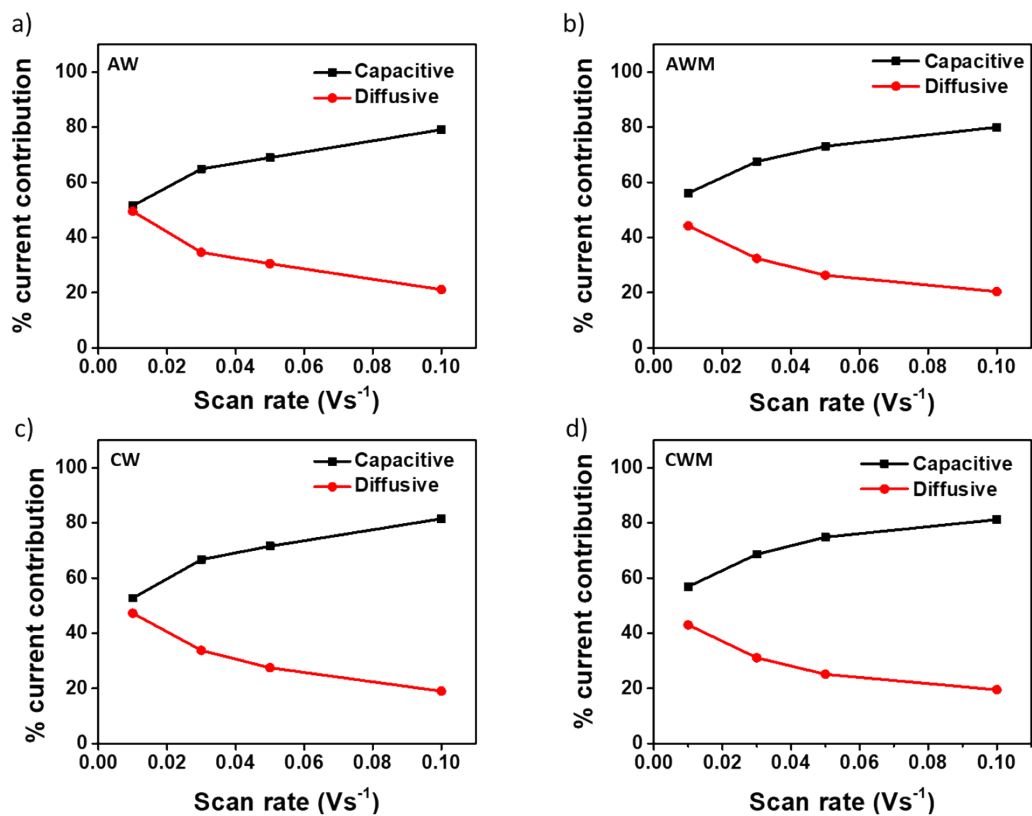

Fig. S6. Contribution from capacitive and diffusive current for a) AW film, b) AWM film, c) CW film, and d) CWM film

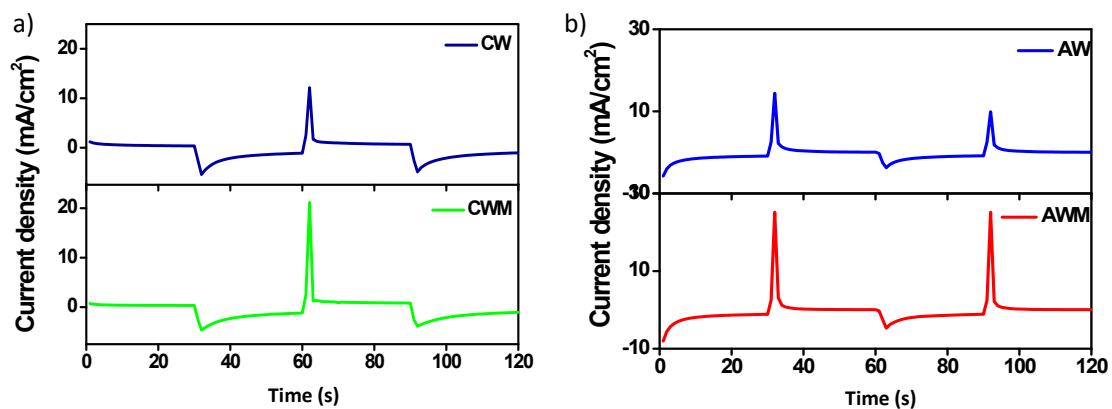

Fig. S7. Chronoamperometry plots of the devices: a) CW and CWM, b) AW and AWM

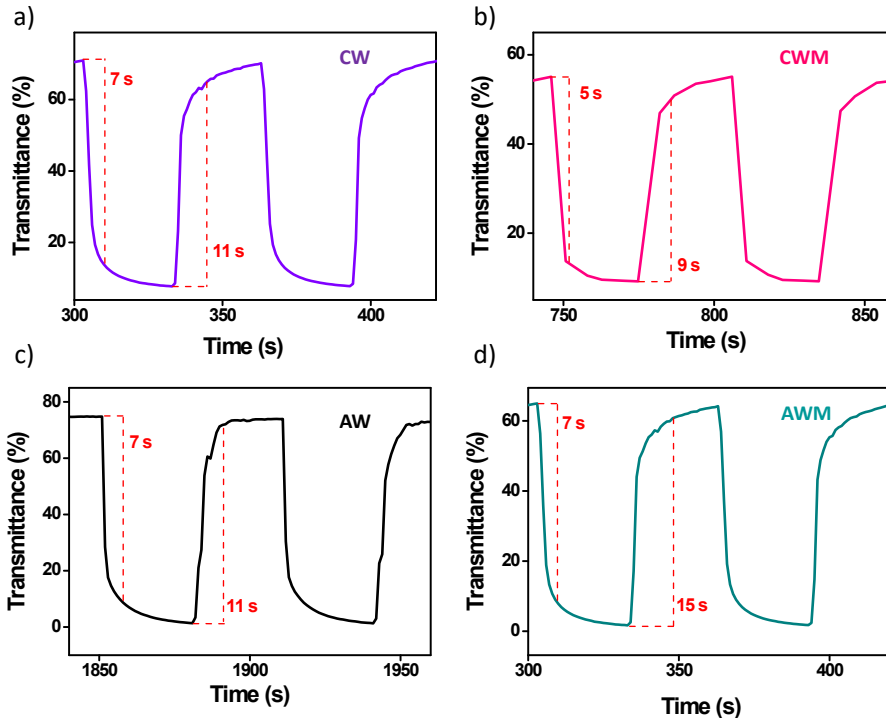

Fig S8. T90 response times of a) device CW, b) device CWM, c) device AW, d) device AWM at 650 nm

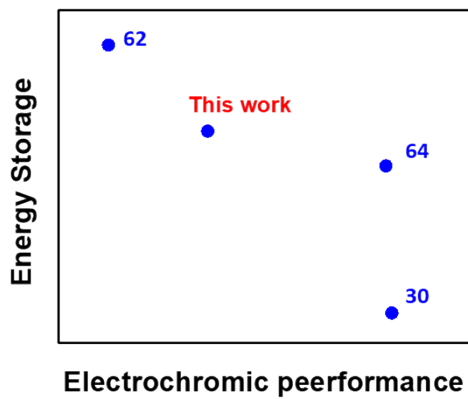

Fig S9. Comparison chart showing electrochromic and energy storage performance of the device with similar works over the last few years
